# Supplementary material
Source: ML conference proceedings conference paper supplement (https://openaccess.thecvf.com/content/CVPR2023/html/Sun_Pose_Synchronization_Under_CVPR_2023_paper.html)
Supplement: Supplementary file 1 [file Sun_Pose_Synchronization_Under_CVPR_2023_supplemental.pdf]

## Supplementary Material: Pose Synchronization under Multiple Pair-wise Relative Poses

In the supplementary material we give proof details of the propositions in the method section and add extra visualization of RGB-D scene recovery results over ScanNet.

### 1. Proofs of Propositions and Theorems in Section 3

#### 1.1. Proof of Prop. 1

In this proof, we are going to show that when  $\alpha > 0$ , both  $Q_{\alpha, l_{\max}, 0}^{\{\sigma_R^l\}, R, S_i}$  and  $Q_{\alpha, l_{\max}, 0}^{\{\sigma_t^l\}, t, S_i}$  are well defined and converge to  $Q_{\alpha, \infty, 0}^{\{\sigma_R^l\}, R, S_i}$ ,  $Q_{\alpha, \infty, 0}^{\{\sigma_t^l\}, t, S_i}$  with the following convergence rate:

$$\|Q_{\alpha, l_{\max}, 0}^{\{\sigma_R^l\}, R, S_i} - Q_{\alpha, \infty, 0}^{\{\sigma_R^l\}, R, S_i}\|_1 \leq \sqrt{\frac{e^{\alpha\lambda_1}}{l_{\max}!} (\alpha\lambda_1)^{l_{\max}} n}, \quad (1)$$

$$\|Q_{\alpha, l_{\max}, 0}^{\{\sigma_t^l\}, t, S_i} - Q_{\alpha, \infty, 0}^{\{\sigma_t^l\}, t, S_i}\|_1 \leq \sqrt{\frac{e^{\alpha\lambda_1}}{l_{\max}!} (\alpha\lambda_1)^{l_{\max}} n}. \quad (2)$$

We first prove that the rotation part  $Q_{\alpha, l_{\max}, 0}^{\{\sigma_R^l\}, R, S_i}$  converges to  $Q_{\alpha, \infty, 0}^{\{\sigma_R^l\}, R, S_i}$ . For the translation part we apply the same technique.

We begin with a practical assumption that  $\{R_{ij} | (i, j) \in \mathcal{E}\}$  can be discretized, meaning that the group in  $SO(3)$  generated by  $\{I_3\} \cup \{R_{ij} | (i, j) \in \mathcal{E}\}$  is finite. We define  $\mathcal{R}$  to be a finite supgroup in  $SO(3)$  of the group generated by  $\{I_3\} \cup \{R_{ij} | (i, j) \in \mathcal{E}\}$  for the flexibility of discretization resolution, which is implied by  $|\mathcal{R}|$ . We index the group elements in  $\mathcal{R}$  as  $\{g_1, \dots, g_{|\mathcal{R}|}\}$  and fix  $g_1 = I_3$ . The group adjacency matrix over the transformation graph  $\mathcal{G}$  and group  $\mathcal{R}$  is defined as an  $n \times n$  block matrix  $A_{\mathcal{R}}(\mathcal{G}) \in \mathbb{R}^{n|\mathcal{R}| \times n|\mathcal{R}|}$ . Each  $|\mathcal{R}| \times |\mathcal{R}|$  block  $A_{ij}$  is a  $(0, 1)$ -matrix with  $A_{ij}(k, l) = \delta(R_{ji}g_l, g_k)$ , where  $\delta(\cdot, \cdot)$  is the Kronecker Delta.  $A_{\mathcal{R}}(\mathcal{G})$  can be interpreted as an adjacency matrix of a graph  $\mathcal{G}_{\mathcal{R}}$  that splits each vertex  $S_i$  in  $\mathcal{G}$  into  $|\mathcal{R}|$  copies  $\{S_{ik}\} := \{S_{i1}, \dots, S_{i|\mathcal{R}|}\}$ , and all the edges  $e_{ij}$  in  $\mathcal{G}$  are also split into  $|\mathcal{R}|$  copies for a complete bipartite matching between  $\{S_{ik}\}$  and  $\{S_{jk}\}$ .

Given a fixed finite  $\sigma_R$ ,  $P^{\sigma_R, R}(\cdot)$  becomes a Gaussian distribution with only one parameter  $R$ , and the un-

normalized distribution of  $R_p$  over all the paths  $p$  with a given length  $|p| = l$  is a mixture of gaussian distributions with different means and weights, but identical standard deviation  $\sqrt{l}\sigma_R$ . Thus this Gaussian mixture distribution can be encoded with a block vector  $X^{(l)} \in \mathbb{R}^{n|\mathcal{R}| \times 1}$ . Each block  $X_i^{(l)}$  of length  $|\mathcal{R}|$  encodes the distribution of the means  $R_p \in \mathcal{R}$  for  $p \in \mathcal{P}_{i_1}^{(l)}$ , and each entry  $X_i^{(l)}(j)$  in the block indicates the weight of  $g_j$ . For  $l = 0$ , we have one candidate  $g_1 = I_3$  for the rotation from  $S_1$  to itself, and thus we setup the initialization and iteration for computing the distribution of  $R_p$  of all the path lengths as

$$\begin{aligned} X^{(0)} &= e_1, \\ X^{(l)} &= A_{\mathcal{R}}(\mathcal{G})X^{(l-1)}, \quad l \geq 1, \end{aligned} \quad (3)$$

Where  $e_1$  is the one-hot vector in its first entry. For simplicity we assume that  $\sigma_R = \infty$ , and  $Q_{\alpha, l_{\max}, 0}^{\{\sigma_R^l\}, R, S_i}(\cdot)$  can be computed with

$$\begin{aligned} Q_{\alpha, l_{\max}, 0}^{\{\sigma_R^l\}, R, S_i}(g_j) &= \sum_{l=1}^{l_{\max}} \frac{\alpha^l}{l!} X_i^{(l)}(j) \\ &= \left( \sum_{l=1}^{l_{\max}} \frac{(\alpha A_{\mathcal{R}}(\mathcal{G}))^l}{l!} X^{(0)} \right)_i(j), \end{aligned} \quad (4)$$

and the residual is

$$\begin{aligned} \Delta_{l_{\max}} &:= Q_{\alpha, \infty, 0}^{\{\sigma_R^l\}, R, S_i} - Q_{\alpha, l_{\max}, 0}^{\{\sigma_R^l\}, R, S_i} \\ &= \sum_{l=l_{\max}}^{\infty} \frac{(\alpha A_{\mathcal{R}}(\mathcal{G}))^l}{l!} X^{(0)}. \end{aligned} \quad (5)$$

Since  $A_{\mathcal{R}}(\mathcal{G})$  is real symmetric, let  $A_{\mathcal{R}}(\mathcal{G}) = U\Lambda U^T$  denote the diagonalization of  $A_{\mathcal{R}}(\mathcal{G})$ , with the eigenvalues  $\lambda_1, \dots, \lambda_{n|\mathcal{R}|}$  distributed in the diagonal of  $\Lambda$  in descending order. (5) is then reformed as

$$\Delta_{l_{\max}} = U \left( \sum_{l=l_{\max}}^{\infty} \frac{(\alpha\Lambda)^l}{l!} \right) U^T X^{(0)}. \quad (6)$$

To show that (6) converges, it suffices to prove the convergence of the infinite series  $\left\{ \frac{(\alpha\lambda_k)^l}{l!}, 1 \leq k \leq n|\mathcal{R}| \right\}$ .

Note that

$$\sum_{l=0}^{\infty} \frac{(\alpha\lambda_k)^l}{l!} = e^{\alpha\lambda_k} \quad (7)$$

is finite for every  $k$ , which gives  $\lim_{l_{\max} \rightarrow \infty} \Delta_{l_{\max}} = 0$ .

Next we approximate the convergence rate of  $\Delta_{l_{\max}}$ . Since  $A_{\mathcal{R}}(G)$  is the adjacency matrix of  $\mathcal{G}_{\mathcal{R}}$ ,  $\Lambda$  is bounded by

$$d(\mathcal{G}) = d(\mathcal{G}_{\mathcal{R}}) \geq \lambda_1 \geq -\lambda_{n|\mathcal{R}|}, \quad (8)$$

Where  $d(\cdot)$  is the graph degree. Moreover,  $\mathcal{G}_{\mathcal{R}}$  can be viewed as  $|\mathcal{R}|$  identical copies of  $\mathcal{G}$ , which means  $\lambda_1$  also equals the spectral norm of the adjacency matrix of  $\mathcal{G}$ . Apply the Taylor remainder theorem, we have

$$\left| \sum_{l=l_{\max}}^{\infty} \frac{(\alpha\lambda_k)^l}{l!} \right| \leq \left| \frac{\max(1, e^{\alpha\lambda_k})}{l_{\max}!} (\alpha\lambda_k)^{l_{\max}} \right| \quad (9)$$

$$\leq \frac{e^{\alpha\lambda_1}}{l_{\max}!} (\alpha\lambda_1)^{l_{\max}}.$$

Since  $X^{(0)}$  is a unit vector, we have

$$\|\Delta_{l_{\max}}\|_2 \leq \frac{e^{\alpha\lambda_1}}{l_{\max}!} (\alpha\lambda_1)^{l_{\max}}. \quad (10)$$

(10) holds for arbitrary discretization resolution  $|\mathcal{R}|$  and in the remaining part of this proof we consider the case where the group  $\mathcal{R}$  generated by  $\{I_3\} \cup \{R_{ij} | (i, j) \in \mathcal{E}\}$  is infinite, with  $\hat{\mathcal{R}}$  being a discrete approximation. Let

$$\hat{R}_{ij} := \operatorname{argmin}_{\hat{R} \in \hat{\mathcal{R}}} \|\hat{R} - R_{ij}\|_{\mathcal{F}} \quad (11)$$

be the projection of  $R_{ij}$  on  $\hat{\mathcal{R}}$  and  $\hat{Q}$  be the distribution generated by  $\{\hat{R}_{ij}\}, (i, j) \in \mathcal{E}$ . Apply (10) to  $\hat{Q}$  and we know that  $\hat{Q}_{\alpha, l_{\max}, 0}^{\{\sigma_R^l\}, R, S_i}$  converges to  $Q_{\alpha, \infty, 0}^{\{\sigma_R^l\}, R, S_i}$ .

We define the difference between  $\hat{Q}_{\alpha, l_{\max}, 0}^{\{\sigma_R^l\}, R, S_i}$  and  $Q_{\alpha, \infty, 0}^{\{\sigma_R^l\}, R, S_i}$  as  $(\hat{\Delta}_{l_{\max}})_i$ . In the above we view  $(\hat{\Delta}_{l_{\max}})_i$  as the  $i$ -th block of the vector  $\hat{\Delta}_{l_{\max}}$  indicating the strength at  $\forall \hat{g}_j \in \hat{\mathcal{R}}$ . Now instead, we consider it as a function  $(\hat{\Delta}_{l_{\max}})_i(\cdot) : SO^3 \rightarrow R$ , composed of weighted Dirac delta functions at  $\forall \hat{g}_j \in \hat{\mathcal{R}}$  with  $\sigma^R = \infty$ . Suppose that  $(\Delta_{l_{\max}})_i(\cdot)$  is also well defined with respect to  $Q$ . We have

$$\int_{R \in SO(3)} (\Delta_{l_{\max}})_i(R) dR = \int_{R \in SO(3)} (\hat{\Delta}_{l_{\max}})_i(R) dR, \quad (12)$$

since on both sides we are counting over all the possible paths of length greater than  $l_{\max}$ . Given that  $|\hat{\mathcal{R}}|$  is a finite constant, combining (10) and (12) shows that

$$\sum_{i=1}^n \|(\Delta_{l_{\max}})_i\|_1 \leq \sqrt{\frac{e^{\alpha\lambda_1}}{l_{\max}!} (\alpha\lambda_1)^{l_{\max}} n |\mathcal{R}|}. \quad (13)$$

In fact, (12) holds for arbitrary  $\sigma^R$  since the 1-norm of any probability distribution function equals 1. For the extreme case where we set  $|\mathcal{R}| = 1$ , we finish the proof with

$$\sum_{i=1}^n \|(\Delta_{l_{\max}})_i\|_1 \leq \sqrt{\frac{e^{\alpha\lambda_1}}{l_{\max}!} (\alpha\lambda_1)^{l_{\max}} n}. \quad (14)$$

□

## 1.2. Proof of Prop. 2

We hereby recall Prop. 2 first:

Suppose all  $T_{ij}$  are independent and identically follow a normal distribution  $R \sim \mathcal{N}(\mu_R, \sigma_R)$ ,  $\mathbf{t} \sim \mathcal{N}(\mu_{\mathbf{t}}, \sigma_{\mathbf{t}})$  with probability  $w_1$  and a uniform distribution with probability  $w_2$ . Let  $P_1, P_2$  be the PDFs of the two distributions. If  $(1 - w_1^{\alpha\lambda_1})P_2(t) \ll 1$ , then almost surely the global maximums of  $Q_{\alpha, \infty, 0}^{\{\sigma_R^l\}, R, S_i}$  and  $Q_{\alpha, \infty, 0}^{\{\sigma_t^l\}, \mathbf{t}, S_i}$  are within the  $\Delta$ -neighborhood of the ground-truth, where

$$\Delta \sim O(\lambda_1^{-\frac{1}{6}} (\ln \alpha\lambda_1)^{\frac{2}{3}}).$$

Moreover, this neighborhood is almost convex when we choose  $\sigma_R, \sigma_{\mathbf{t}} \sim O(\Delta)$ .

In this prove we focus on the property of translations  $\mathbf{t}$  and for rotations  $R$  a similar technique can be applied. Without losing generality, we consider the case where  $\mathbf{t}_{ij}^* = \mathbf{0}, \forall (i, j) \in \mathcal{E}$ , meaning that the input  $\mathbf{t}_{ij}$  is a distribution

$$\mathbf{t}_{ij} = \mathcal{D}_{\mathbf{t}} := w_1 \mathcal{N}(\mathbf{0}, \sigma_1^2 I) + w_2 \mathcal{U}(d), \quad (15)$$

where  $\mathcal{U}(d)$  denotes a uniform distribution over the ball in  $\mathbb{R}^3$  of radius  $d$ . However, directly taking the distribution as an input can cause ambiguity in defining the accumulated translation along a path  $p$ . Therefore we still start from a discrete setting. Moreover, since  $\mathbf{t}$  is independent along each dimension, we consider its component along one dimension and call it  $t$ .

Let  $\mathcal{R}, A_{\mathcal{R}}(G), X^{(0)}$  be defined the same as in the proof of Prop ???. For each block  $A_{ij}$ , if we denote the translation implied by the  $(u, v)$ -th entry as  $t(u, v)$ , then  $A_{ij}(u, v)$  is assigned the value  $\frac{1}{Z} P_{t \sim \mathcal{D}_t}(t(u, v))$ , where  $Z$  is a global regularization coefficient. It is obvious that all the blocks  $A_{ij}$  for  $(i, j) \in \mathcal{E}$  are identical, which we denote as  $D_{t, \mathcal{R}}$  and as the resolution goes to infinity,  $A$  converges to  $\mathcal{D}_t$ . In fact, if  $A(G)$  denotes the adjacency matrix of  $G$ , then

$$A_{\mathcal{R}}(G) = A(G) \otimes D_{t, \mathcal{R}}. \quad (16)$$

We can view the construction of  $A_{\mathcal{R}}(G)$  as fixing a set of evenly sampled  $\{t(u, v)\}$  in distribution  $\mathcal{D}_t$ . For a path  $p = (e_1, e_2, \dots, e_{|p|})$  with finite length  $|p|$ , each  $t(e_i), 1 \leq i \leq$

$|p|$  takes value from  $\{t(u, v)\}$  with probability  $D_{t, \mathcal{R}}(u, v)$ . By enforcing a high resolution  $|\mathcal{R}|$ , we can approximate the distribution of the translation  $t(p)$  along any path  $p$  with a bounded length  $|p| \leq l_{\max}$  as

$$P(t(p)) = \prod_{i=1}^{|p|} P_{t \sim \mathcal{D}_t}(t(e_i)). \quad (17)$$

Thus, for any  $l \leq l_{\max}$ ,  $X^{(l)} = A_{\mathcal{R}}(G)^l X^{(0)}$  encodes the distribution of all paths with length  $l$ . For the  $k$ -th block  $X_k^{(l)}$ ,  $|\mathcal{P}_{1k}^{(l)}| = \|X_k^{(l)}\|_1$  is the number of paths  $p$  from  $S_1$  to  $S_k$  with length  $l$  and  $X_k^{(l)} / \|X_k^{(l)}\|_1$  is the distribution from which all such paths  $p$  are i.i.d. sampled. To be specific,

$$X_k^{(l)} / \|X_k^{(l)}\|_1 = (D_{t, \mathcal{R}})^l e_1. \quad (18)$$

Next we bound the difference between the distribution of sampled  $p$  and the real distribution  $(D_{t, \mathcal{R}})^l e_1$ . In the context of discretized distribution, we set a label  $r(p)$  to a path  $p$  if  $t(p)$  falls into the  $r(p)$ -th bin among all the  $|\mathcal{R}|$  bins, and  $P_r := (D_{t, \mathcal{R}})^l e_1(r)$  be the probability that  $p$  falls into bin  $r$ . We index all the paths in  $\mathcal{P}_{1k}^{(l)}$  as  $p_1, p_2, \dots, p_m$ . Let  $Y_{i,r}$  be the indicator variable of  $r(p_i) = r$ . Apply Chernoff bound over  $Y_{i,r}$ ,  $1 \leq i \leq m$  and any  $\delta > 0$ :

$$P\left(\left|\sum_{i=1}^m Y_{i,r} - mP_r\right| > \delta m P_r\right) < 2 \exp \frac{-mP_r \delta^2}{3}. \quad (19)$$

Then apply union bound over all  $r$ , we have

$$P\left(\left|\sum_{i=1}^m Y_{i,r} - mP_r\right| < \delta m P_r, \forall r\right) > 1 - 2 \sum_{r=1}^{|\mathcal{R}|} \exp \frac{-mP_r \delta^2}{3}. \quad (20)$$

To analyze the concentration of  $t(p_i)$ ,  $1 \leq i \leq m$ , suppose that bin 1 has a width of  $2\Delta$ , i.e., for any  $p$  such that  $r(p) = 1$ , we have  $-\Delta < t(p) < \Delta$ . Compare the mass of the central bin with bin  $r$  in the distribution of  $t(p)$ , we have

$$\frac{P_{r=1}}{P_r} = \frac{\int_{-\Delta}^{\Delta} \left( w_1^l \frac{1}{\sqrt{2\pi\sigma_1}} e^{\frac{-t^2}{2\sigma_1^2}} + C(1 - w_1^l) \right) dt}{\int_{(2r-1)\Delta}^{(2r+1)\Delta} \left( w_1^l \frac{1}{\sqrt{2\pi\sigma_1}} e^{\frac{-t^2}{2\sigma_1^2}} + C(1 - w_1^l) \right) dt}, \quad (21)$$

Where  $C$  is a small constant to include the uniform part of the distribution of  $t(p)$ . When  $\Delta \ll d$ , (21) is bounded by

$$\frac{P_{r=0}}{P_r} \geq e^{\frac{(2r-1)^2 \Delta^2}{2l\sigma_1^2}}. \quad (22)$$

In order to cluster  $t(p)$  for  $p \in \mathcal{P}_{1k}^{(l)}$ , we apply a gaussian kernel with standard deviation  $\sigma_2$  at each sampled  $t(p)$  and get a Gaussian mixture model

$$g^{(l)}(t) = \sum_{p \in \mathcal{P}_{1k}^{(l)}} e^{-\frac{(t-t(p))^2}{2\sigma_2^2}}. \quad (23)$$

For any  $-\Delta \leq t \leq \Delta$ ,

$$g^{(l)}(t) \geq \sum_{\substack{p \in \mathcal{P}_{1k}^{(l)} \\ r(p)=1}} e^{-\frac{4\Delta^2}{2\sigma_2^2}}. \quad (24)$$

Moreover, for any  $|t| \geq 5\Delta$ ,

$$g^{(l)}(t) \leq \sum_{\substack{p \in \mathcal{P}_{1k}^{(l)} \\ r(p)=1}} e^{-\frac{16\Delta^2}{2\sigma_2^2}} + \sum_{\substack{p \in \mathcal{P}_{1k}^{(l)} \\ r(p) \neq 1}} 1. \quad (25)$$

Combining (22) with (25), it is almost sure that

$$g^{(l)}(t) \leq \sum_{\substack{p \in \mathcal{P}_{1k}^{(l)} \\ r(p)=1}} \left( e^{-\frac{16\Delta^2}{2\sigma_2^2}} + \frac{1+\delta}{1-\delta} \sum_{r=3}^{|\mathcal{R}|} e^{-\frac{(2r-1)^2 \Delta^2}{2l\sigma_1^2}} \right). \quad (26)$$

Therefore when  $\sigma_2^2 \geq l\sigma_1^2$  and  $\Delta > \sqrt{\frac{\ln(1+2\delta)}{25}} l\sigma_1$ , the global maximum of  $g^{(l)}(t)$  is in  $(-5\Delta, 5\Delta)$ .

Since we do not know the ground truth of  $t(p)$ , it remains to find out where bin 1 lies in. With a given sample set  $t(p_1), \dots, t(p_m)$ . let  $W$  denote the event that we successfully assign all the bins such that  $|\sum_{i=1}^m Y_{i,r} - mP_r| < \delta m P_r$  holds for every  $r$ . As long as the event in the left-hand-side of 20 happens,  $P(W) = 1$  and bin 1 is assigned with at most  $\Delta$  error. If we discard every  $|t(p_i)| \geq 6\Delta$ ,  $1 \leq i \leq m$  and set  $\sigma_2 \geq 6\Delta$ , then the global maximum of  $g^{(l)}(t)$  can be reached by gradient descend from any remaining initial point  $t(p)$ .

Next we generalize the above result to all the paths  $p$  from  $S_1$  to  $S_k$  with length  $|p| \leq l_{\max}$ . The number of such paths is bounded by

$$c\lambda_1^l - b \leq \sum_{l=1}^{l_{\max}} |\mathcal{P}_{1k}^l| \leq c\lambda_1^l + b \quad (27)$$

for some constant  $b, c$ , where  $\lambda_1$  is the largest eigenvalue of  $A(G)$ . For (20) to happen with high probability over all  $l$ , we require

$$2 \sum_{l < l_{\max}} \sum_{r=1}^{|\mathcal{R}|} \exp \frac{-c\lambda_1^l P_r \delta(l)^2}{3} \leq e^{-c_1} \quad (28)$$

for some  $c_1 > 0$ , leading to

$$\delta(l) \sim O(\lambda_1^{-\frac{l}{2}} e^{\frac{|\mathcal{R}|}{2l\sigma_1^2}} \ln l_{\max}). \quad (29)$$

Therefore we require

$$\Delta \sim O(\lambda_1^{-\frac{l}{4}} e^{\frac{|\mathcal{R}|}{4l\sigma_1^2}} \ln l_{\max} \sqrt{l\sigma_1}) = O(\lambda_1^{-\frac{l}{4}} \ln l_{\max} \sqrt{|\mathcal{R}|}). \quad (30)$$

Recall that in the proof of Prop. 1, we require  $l_{\max} \sim O(\alpha\lambda_1)$  to make all the paths of length greater than  $l_{\max}$  negligible. Since  $|\mathcal{R}| \sim O(1/\Delta)$ , we have  $\Delta \sim O(\lambda_1^{-\frac{1}{6}}(\ln(\alpha\lambda))^\frac{2}{3})$ .

### 1.3. Proof of Prop. 3

The derivative of  $Q^T$  with respect to  $\mathbf{t}'$  is given by

$$\frac{\partial Q^T}{\partial \mathbf{t}'}(T') = - \sum_{k=1}^K \frac{w_k}{\sigma_{k,t}^2} e^{-d_{\sigma_k,R,\sigma_k,t}^2(T',T_k)} (\mathbf{t}' - \mathbf{t}_k)$$

There

$$\frac{\partial Q^T}{\partial \mathbf{t}'}(T') = 0 \rightarrow \mathbf{t}' = \frac{\sum_{k=1}^K \frac{w_k}{\sigma_{k,t}^2} e^{-d_{\sigma_k,R,\sigma_k,t}^2(T',T_k)} \mathbf{t}_k}{\sum_{k=1}^K \frac{w_k}{\sigma_{k,t}^2} e^{-d_{\sigma_k,R,\sigma_k,t}^2(T',T_k)}}.$$

To compute the derivative of  $Q^T$  with respect to  $R'$ , we parameterize rotations near a current rotation  $R'$  as

$$R = \exp(\mathbf{c} \times) R', \quad \forall \mathbf{c} \in \mathbb{R}^3.$$

Under this parameterization, we have  $\forall 1 \leq i \leq 3$

$$\begin{aligned} & \mathbf{e}_i^T \cdot \frac{\partial Q^T}{\partial \mathbf{c}}(T') \\ &= - \sum_{k=1}^K \frac{w_k}{\sigma_{k,R}^2} e^{-d_{\sigma_k,R,\sigma_k,t}^2(T',T_k)} \langle R', \mathbf{e}_i \times R' \rangle \\ & \quad + \sum_{k=1}^K \frac{w_k}{\sigma_{k,R}^2} e^{-d_{\sigma_k,R,\sigma_k,t}^2(T',T_k)} \langle R_k, \mathbf{e}_i \times R' \rangle \\ &= - \sum_{k=1}^K \frac{w_k}{\sigma_{k,R}^2} e^{-d_{\sigma_k,R,\sigma_k,t}^2(T',T_k)} \langle R' R'^T, \mathbf{e}_i \times \rangle \\ & \quad + \sum_{k=1}^K \frac{w_k}{\sigma_{k,R}^2} e^{-d_{\sigma_k,R,\sigma_k,t}^2(T',T_k)} \langle R_k, \mathbf{e}_i \times R' \rangle \\ &= \sum_{k=1}^K \frac{w_k}{\sigma_{k,R}^2} e^{-d_{\sigma_k,R,\sigma_k,t}^2(T',T_k)} \langle R_k, \mathbf{e}_i \times R' \rangle \\ &= \langle U \Sigma V^T, \mathbf{e}_i \times R' \rangle \\ &= \langle \Sigma, U^T \mathbf{e}_i \times U U^T R' V \rangle \\ &= \langle \Sigma, U^T \mathbf{e}_i \times U \bar{R} \rangle, \quad \bar{R} = U^T R' V \end{aligned} \quad (31)$$

Denote  $U = (\mathbf{u}_1, \mathbf{u}_2, \mathbf{u}_3)^T$ . It is easy to check that

$$U^T (\mathbf{e}_i \times) U = \mathbf{u}_i \times$$

Therefore, applying (31), we have that if  $\frac{\partial Q^T}{\partial R'}(T') = 0$ , then

$$0 = \langle \Sigma, \mathbf{u}_i \times \bar{R} \rangle, \quad 1 \leq i \leq 3. \quad (32)$$

Denote  $\mathbf{u}_i = (u_{i1}, u_{i2}, u_{i3})^T$ ,  $\bar{R} = (\bar{r}_{ij})_{1 \leq i, j \leq 3}$ , and  $\Sigma = \text{diag}(\sigma_1, \sigma_2, \sigma_3)$ . Expanding (32), we arrive at  $\forall 1 \leq i \leq 3$

$$u_{i1}(\bar{r}_{23}\sigma_3 - \bar{r}_{32}\sigma_2) + u_{i2}(\bar{r}_{31}\sigma_1 - \bar{r}_{13}\sigma_3) + u_{i3}(\bar{r}_{12}\sigma_2 - \bar{r}_{21}\sigma_1) = 0.$$

It follows that

$$\bar{r}_{ij}\sigma_j = \bar{r}_{ji}\sigma_i, \quad \forall 1 \leq i < j \leq 3. \quad (33)$$

Parameterize  $\bar{R}$  using the axis-angle parameterization

$$\bar{R} = \cos(\bar{\theta})I_3 + (1 - \cos(\bar{\theta}))\bar{\mathbf{n}}\bar{\mathbf{n}}^T + \sin(\bar{\theta})\bar{\mathbf{n}} \times \quad (34)$$

where  $\bar{\mathbf{n}} = (\bar{n}_1, \bar{n}_2, \bar{n}_3)^T$  and  $\bar{\theta}$  are the rotation axis and rotation angle respectively.

Substituting (34) into (33), we obtain

$$(\sigma_2 - \sigma_1)\bar{n}_1\bar{n}_2(1 - \cos(\bar{\theta})) = (\sigma_1 + \sigma_2)\bar{n}_3 \sin(\bar{\theta}) \quad (35)$$

$$(\sigma_1 - \sigma_3)\bar{n}_1\bar{n}_3(1 - \cos(\bar{\theta})) = (\sigma_1 + \sigma_3)\bar{n}_2 \sin(\bar{\theta}) \quad (36)$$

$$(\sigma_3 - \sigma_2)\bar{n}_2\bar{n}_3(1 - \cos(\bar{\theta})) = (\sigma_2 + \sigma_3)\bar{n}_1 \sin(\bar{\theta})$$

We show that  $\bar{\theta} = 0$ . This means  $\bar{R} = I_3$  or  $R' = UV^T$ , which ends the proof. Suppose  $\bar{\theta} \neq 0$ . It follows that  $\bar{n}_i \neq 0, 1 \leq i \leq 3$ . Otherwise  $\sin(\bar{\theta}) = 0$  as  $\max(|\bar{n}_i|) > 0$ . When  $\bar{n}_i \neq 0, 1 \leq i \leq 3$ , we have  $\sigma_i \neq \sigma_j, \forall 1 \leq i < j \leq 3$ . Without losing generality, we assume  $\sigma_1 > \sigma_2 > \sigma_3$ . In this case, factoring out  $\bar{\theta}$  in (35) to (36), we have

$$\frac{\sigma_2 - \sigma_1}{\sigma_1 - \sigma_3} = \frac{|\bar{n}_3|^2(\sigma_2 + \sigma_1)}{|\bar{n}_2|^2(\sigma_3 + \sigma_1)} \quad (37)$$

which results in a contradiction as the left side (37) is negative while its right side is positive.  $\square$

### 1.4. Proof of Prop. 4

We begin with simplifying the objective function of (15):

$$\begin{aligned} & \int_{T' \in \mathbb{R}^{3 \times 4}} \left( w e^{-d_{\sigma_R,\sigma_t}^2(T',T_j^*)} - \sum_{k \in \mathcal{C}_j} w_k e^{-d_{\sigma_k,R,\sigma_k,t}^2(T',T_k)} \right)^2 \\ &= w^2 \cdot \int_{R' \in \mathbb{R}^{3 \times 3}} e^{-\frac{\|R' - R_j^*\|_{\mathcal{F}}^2}{\sigma_R^2}} \int_{\mathbf{t}' \in \mathbb{R}^3} e^{-\frac{\|\mathbf{t}' - \mathbf{t}_j^*\|^2}{\sigma_t^2}} + \sum_{k, k' \in \mathcal{C}_j} w_k w_{k'} \\ & \quad \int_{T' \in \mathbb{R}^{3 \times 4}} e^{-d_{\sigma_k,R,\sigma_k,t}^2(T',T_k) - d_{\sigma_{k'},R,\sigma_{k'},t}^2(T',T_{k'})} \\ & \quad - 2w \sum_{k \in \mathcal{C}_j} w_k \int_{R' \in \mathbb{R}^{3 \times 3}} e^{-\frac{\|R' - R_j^*\|_{\mathcal{F}}^2}{2\sigma_R^2} - \frac{\|R' - R_k\|_{\mathcal{F}}^2}{2\sigma_k^2}} \\ & \quad \int_{\mathbf{t}' \in \mathbb{R}^3} e^{-\frac{\|\mathbf{t}' - \mathbf{t}_j^*\|_{\mathcal{F}}^2}{2\sigma_t^2} - \frac{\|\mathbf{t}' - \mathbf{t}_k\|^2}{2\sigma_k^2}} \end{aligned}$$

$$=w^2\sigma_R^9\sigma_t^3\pi^6 + \text{const}$$

$$-2w \sum_{k \in \mathcal{C}_j} w_k \int_{R'} e^{-\frac{\sigma_R^2 + \sigma_{k,R}^2}{2\sigma_R^2\sigma_{k,R}^2} \|R' - \frac{R_j^* \sigma_{k,R}^2 + R_k \sigma_R^2}{\sigma_R^2 + \sigma_{k,R}^2}\|_{\mathcal{F}}^2 - \frac{\|R_j^* - R_k\|_{\mathcal{F}}^2}{2(\sigma_R^2 + \sigma_{k,R}^2)}} \\ \int_{t'} e^{-\frac{\sigma_t^2 + \sigma_{k,t}^2}{2\sigma_t^2\sigma_{k,t}^2} \|t' - \frac{t_j^* \sigma_{k,t}^2 + t_k \sigma_t^2}{\sigma_t^2 + \sigma_{k,t}^2}\|^2 - \frac{\|t_j^* - t_k\|^2}{2(\sigma_t^2 + \sigma_{k,t}^2)}}$$

$$=w^2\sigma_R^9\sigma_t^3\pi^6 + \text{const} - 2w \sum_{k \in \mathcal{C}_j} \left( w_k (2\pi)^6 \frac{\sigma_R^9 \sigma_{k,R}^9}{(\sigma_R^2 + \sigma_{k,R}^2)^{\frac{9}{2}}} \right. \\ \left. \frac{\sigma_t^3 \sigma_{k,t}^3}{(\sigma_t^2 + \sigma_{k,t}^2)^{\frac{3}{2}}} \cdot e^{-\frac{\|R_j^* - R_k\|_{\mathcal{F}}^2}{2(\sigma_R^2 + \sigma_{k,R}^2)} - \frac{\|t_j^* - t_k\|^2}{2(\sigma_t^2 + \sigma_{k,t}^2)}} \right) \quad (38)$$

For fixed  $\sigma_R$  and  $\sigma_t$ , it is clear that the optimal  $w$  is given by

$$w^* = \sum_{k \in \mathcal{C}_j} w_k \left( \frac{2\sigma_{k,R}^2}{(\sigma_R^2 + \sigma_{k,R}^2)} \right)^{\frac{9}{2}} \left( \frac{2\sigma_{k,t}^2}{(\sigma_t^2 + \sigma_{k,t}^2)} \right)^{\frac{3}{2}} \\ \cdot e^{-\frac{\|t_j^* - t_k\|^2}{2(\sigma_t^2 + \sigma_{k,t}^2)}} e^{-\frac{\|R_j^* - R_k\|_{\mathcal{F}}^2}{2(\sigma_R^2 + \sigma_{k,R}^2)}} \quad (39)$$

Substituting (39) into (38), we have that the optimal  $\sigma_R^*$  and  $\sigma_t^*$  are given by

$$\sigma_R^*, \sigma_t^* = \arg \max_{\sigma_R, \sigma_t} \sum_{k \in \mathcal{C}_j} w_k \left( \frac{2\sigma_t \sigma_{k,t}^2}{(\sigma_t^2 + \sigma_{k,t}^2)} \right)^{\frac{3}{2}} e^{-\frac{\|t_j^* - t_k\|^2}{2(\sigma_t^2 + \sigma_{k,t}^2)}} \\ \left( \frac{2\sigma_R \sigma_{k,R}^2}{(\sigma_R^2 + \sigma_{k,R}^2)} \right)^{\frac{9}{2}} e^{-\frac{\|R_j^* - R_k\|_{\mathcal{F}}^2}{2(\sigma_R^2 + \sigma_{k,R}^2)}} \quad (40)$$

□

### 1.5. Details on Variance Optimization of (40)

We solve (40) via alternating maximization, starting from  $\sigma_R = \text{median}(\sigma_{k,R})$  and  $\sigma_t = \text{median}(\sigma_{k,t})$ . When  $\sigma_t$  is fixed, the optimization problem reduces to

$$\max_{\sigma_R} h_{\sigma_t}(\sigma_R) \quad (41)$$

where

$$h_{\sigma_t}(\sigma_R) := \sum_{k \in \mathcal{C}_j} w_{k,\sigma_t} \cdot \left( \frac{2\sigma_R \sigma_{k,R}^2}{(\sigma_R^2 + \sigma_{k,R}^2)} \right)^{\frac{9}{2}} e^{-\frac{\|R_j^* - R_k\|_{\mathcal{F}}^2}{2(\sigma_R^2 + \sigma_{k,R}^2)}} \\ w_{k,t} := w_k \cdot \left( \frac{2\sigma_t \sigma_{k,t}^2}{(\sigma_t^2 + \sigma_{k,t}^2)} \right)^{\frac{3}{2}} e^{-\frac{\|t_j^* - t_k\|^2}{2(\sigma_t^2 + \sigma_{k,t}^2)}}.$$

Computing the derivative of  $h_{\sigma_t}(\sigma_R)$  with respect to  $\sigma_R$ , we can see that  $\sigma_R$  is a critical point of  $h_{\sigma_t}(\sigma_R)$  if

$$0 = \sum_{k \in \mathcal{C}_j} w_{k,\sigma_t} \cdot \left( \frac{2\sigma_R \sigma_{k,R}^2}{(\sigma_R^2 + \sigma_{k,R}^2)} \right)^{\frac{7}{2}} e^{-\frac{\|R_j^* - R_k\|_{\mathcal{F}}^2}{2(\sigma_R^2 + \sigma_{k,R}^2)}} \\ \left( \frac{9\sigma_{k,R}^2(\sigma_{k,R}^2 - \sigma_R^2)}{(\sigma_R^2 + \sigma_{k,R}^2)^2} + \frac{2\sigma_R^2 \sigma_{k,R}^2 \|R_j^* - R_k\|_{\mathcal{F}}^2}{(\sigma_R^2 + \sigma_{k,R}^2)^3} \right) \quad (42)$$

Denote

$$c_{k,\sigma_R,1} = \left( \frac{2\sigma_R \sigma_{k,R}^2}{(\sigma_R^2 + \sigma_{k,R}^2)} \right)^{\frac{7}{2}} e^{-\frac{\|R_j^* - R_k\|_{\mathcal{F}}^2}{2(\sigma_R^2 + \sigma_{k,R}^2)}} \frac{9\sigma_{k,R}^2}{(\sigma_R^2 + \sigma_{k,R}^2)^2}, \\ c_{k,\sigma_R,2} = \left( \frac{2\sigma_R \sigma_{k,R}^2}{(\sigma_R^2 + \sigma_{k,R}^2)} \right)^{\frac{7}{2}} e^{-\frac{\|R_j^* - R_k\|_{\mathcal{F}}^2}{2(\sigma_R^2 + \sigma_{k,R}^2)}} \\ \cdot \left( \frac{9\sigma_{k,R}^4}{(\sigma_R^2 + \sigma_{k,R}^2)^2} + \frac{2\sigma_R^2 \sigma_{k,R}^2 \|R_j^* - R_k\|_{\mathcal{F}}^2}{(\sigma_R^2 + \sigma_{k,R}^2)^3} \right).$$

It is easy to check that (42) is equivalent to

$$\sigma_R^2 \cdot \sum_{k \in \mathcal{C}_j} w_{k,\sigma_t} c_{k,\sigma_R,1} = \sum_{k \in \mathcal{C}_j} w_{k,\sigma_t} c_{k,\sigma_R,2}. \quad (43)$$

(43) leads the following formula for updating  $\sigma_R$ :

$$\sigma_R \leftarrow \sqrt{\frac{\sum_{k \in \mathcal{C}_j} w_{k,\sigma_t} c_{k,\sigma_R,2}}{\sum_{k \in \mathcal{C}_j} w_{k,\sigma_t} c_{k,\sigma_R,1}}} \quad (44)$$

Similarly, when  $\sigma_R$  is fixed, the optimization reduces to

$$\max_{\sigma_t} h_{\sigma_R}(\sigma_t) \quad (45)$$

where

$$h_{\sigma_R}(\sigma_t) := \sum_{k \in \mathcal{C}_j} w_{k,R} \cdot \left( \frac{2\sigma_t \sigma_{k,t}^2}{(\sigma_t^2 + \sigma_{k,t}^2)} \right)^{\frac{3}{2}} e^{-\frac{\|t_j^* - t_k\|^2}{2(\sigma_t^2 + \sigma_{k,t}^2)}} \\ w_{k,R} := w_k \cdot \left( \frac{2\sigma_R \sigma_{k,R}^2}{(\sigma_R^2 + \sigma_{k,R}^2)} \right)^{\frac{9}{2}} e^{-\frac{\|R_j^* - R_k\|_{\mathcal{F}}^2}{2(\sigma_R^2 + \sigma_{k,R}^2)}}.$$

Computing the derivative of  $h_{\sigma_R}(\sigma_t)$  with respect to  $\sigma_t$ , we can see that  $\sigma_t$  is a critical point of  $h_{\sigma_R}(\sigma_t)$  if

$$0 = \sum_{k \in \mathcal{C}_j} w_{k,\sigma_R} \cdot \left( \frac{2\sigma_t \sigma_{k,t}^2}{(\sigma_t^2 + \sigma_{k,t}^2)} \right)^{\frac{1}{2}} e^{-\frac{\|t_j^* - t_k\|^2}{2(\sigma_t^2 + \sigma_{k,t}^2)}} \\ \left( \frac{3\sigma_{k,t}^2(\sigma_{k,t}^2 - \sigma_t^2)}{(\sigma_t^2 + \sigma_{k,t}^2)^2} + \frac{2\sigma_t^2 \sigma_{k,t}^2 \|t_j^* - t_k\|^2}{(\sigma_t^2 + \sigma_{k,t}^2)^3} \right) \quad (46)$$

Denote

$$\begin{aligned}
 c_{k,\sigma_t,1} &= \left( \frac{2\sigma_t\sigma_{k,t}^2}{\sigma_t^2 + \sigma_{k,t}^2} \right)^{\frac{1}{2}} e^{-\frac{\|t_j^* - t_k\|^2}{2(\sigma_t^2 + \sigma_{k,t}^2)}} \frac{3\sigma_{k,t}^2}{(\sigma_t^2 + \sigma_{k,t}^2)^2}, \\
 c_{k,\sigma_t,2} &= \left( \frac{2\sigma_t\sigma_{k,t}^2}{\sigma_t^2 + \sigma_{k,t}^2} \right)^{\frac{1}{2}} e^{-\frac{\|t_j^* - t_k\|^2}{2(\sigma_t^2 + \sigma_{k,t}^2)}} \\
 &\quad \cdot \left( \frac{3\sigma_{k,t}^4}{(\sigma_t^2 + \sigma_{k,t}^2)^2} + \frac{2\sigma_{k,t}^2\sigma_t^2\|t_j^* - t_k\|^2}{(\sigma_t^2 + \sigma_{k,t}^2)^3} \right).
 \end{aligned}$$

It is easy to check that (46) is equivalent to

$$\sigma_k^2 \cdot \sum_{k \in \mathcal{C}_j} w_{k,\sigma_R} c_{k,\sigma_t,1} = \sum_{k \in \mathcal{C}_j} w_{k,\sigma_R} c_{k,\sigma_t,2}. \quad (47)$$

(47) leads the following formula for updating  $\sigma_t$ :

$$\sigma_t \leftarrow \sqrt{\sum_{k \in \mathcal{C}_j} w_{k,\sigma_R} c_{k,\sigma_t,2} / \sum_{k \in \mathcal{C}_j} w_{k,\sigma_R} c_{k,\sigma_t,1}} \quad (48)$$

## 2. More qualitative results over RGB-D datasets

We provide more results over the ScanNet dataset in Figure 1. We observe that Step I and Step II can provide good pose estimations in some of the cases while Step III is capable of refining results with high noise after Step II.

## 3. Running time comparison over RGB image datasets

We provide the running time of all the baseline methods and ours in Table 1 over the Cornell-Artsquad and San-francisco dataset. SESync takes over 3 hours on Cornell-Artsquad and Shonan Rotation Averaging fails to converge over Cornell-Artsquad.

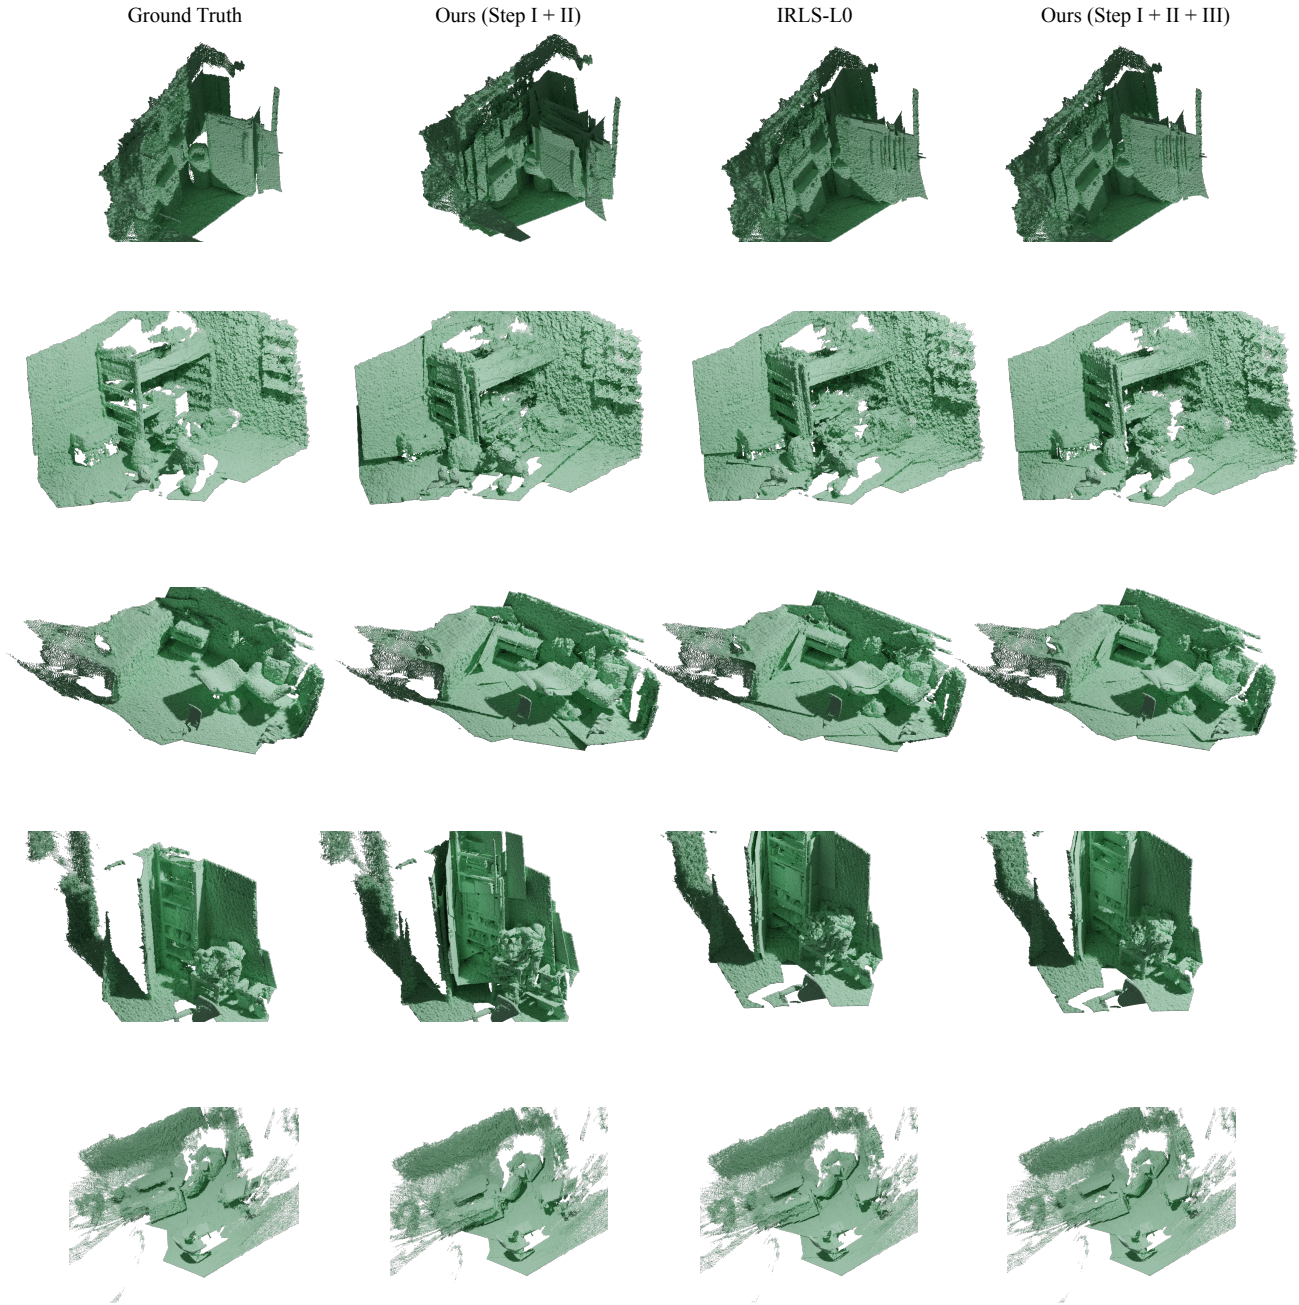

Figure 1. Comparison of qualitative results over 5 scenes from ScanNet. Step I and Step II provides accurate pose estimation in Row 2 and 5 while Step III refines the others considerably.

|               | IRLSL0 | RobustR | SDP | SESync | SFMMRF | SHONAN | TransSync | K-Best | Ours |
|---------------|--------|---------|-----|--------|--------|--------|-----------|--------|------|
| Cornell-Quad  | 93     | 1574    | 50  | -      | 570    | -      | 5323      | 302    | 595  |
| San-francisco | 161    | 763     | 15  | 335    | 433    | 1327   | 1819      | 133    | 243  |

Table 1. Running time (sec.) comparison of all baseline methods and ours over RGB image datasets.
